# Supplementary material for: Comparing Long-Acting Antipsychotic Discontinuation Rates Under Ordinary Clinical Circumstances: A Survival Analysis from an Observational, Pragmatic Study
Source: Springer Nature journal article supplement (doi:10.1007/s40263-021-00809-w), 2021-03-29
Supplement: MOESM1 [file 40263_2021_809_MOESM1_ESM.pdf]

# Comparing Long-Acting Antipsychotic Discontinuation Rates Under Ordinary Clinical

## Circumstances: A Survival Analysis from an Observational, Pragmatic Study

*Federico Bertolini<sup>1\*</sup>, Giovanni Ostuzzi<sup>1\*</sup>, Michela Pievani<sup>1</sup>, Andrea Aguglia<sup>2,3</sup>, Francesco Bartoli<sup>4</sup>, Paola Bortolaso<sup>5</sup>, Camilla Callegari<sup>5</sup>, Mariarita Caroleo<sup>6</sup>, Giuseppe Carrà<sup>4,7</sup>, Mariangela Corbo<sup>8</sup>, Armando D'Agostino<sup>9,10</sup>, Pasquale De Fazio<sup>11</sup>, Fabio Magliocco<sup>6</sup>, Giovanni Martinotti<sup>8</sup>, Edoardo Giuseppe Ostinelli<sup>9,10</sup>, Marco Piero Piccinelli<sup>5</sup>, Federico Tedeschi<sup>1</sup>, Corrado Barbui<sup>1</sup>, the STAR*

### *Network Investigators*

<sup>1</sup> WHO Collaborating Centre for Research and Training in Mental Health and Service Evaluation; Department of Neuroscience, Biomedicine and Movement Sciences; Section of Psychiatry, University of Verona, Verona, Italy

<sup>2</sup> Department of Neuroscience, Rehabilitation, Ophthalmology, Genetics, Maternal and Child Health, Section of Psychiatry, University of Genoa, Genoa, Italy,

<sup>3</sup> IRCCS Ospedale Policlinico San Martino, Genoa, Italy

<sup>4</sup> Department of Medicine and Surgery, University of Milano Bicocca, Monza, Italy

<sup>5</sup> Department of Medicine and Surgery, Division of Psychiatry, University of Insubria-ASST Sette Laghi, Varese, Italy

<sup>6</sup> Department of Health Sciences, Psychiatric Unit, University Magna Græcia of Catanzaro, Catanzaro, Italy

<sup>7</sup> Division of Psychiatry, University College of London, London, UK

<sup>8</sup> Department of Neuroscience, Imaging and Clinical Sciences, University "G. d'Annunzio", Chieti, Italy

<sup>9</sup> Department of Health Sciences, Università degli Studi di Milano, Milan, Italy

<sup>10</sup> Department of Mental Health, San Paolo Hospital, Milan, Italy

<sup>11</sup> Azienda Ospedaliera Universitaria Mater Domini, University Magna Græcia of Catanzaro, Catanzaro, Italy

\* Joint first authors

**Corresponding author:** Federico Bertolini, MD; Department of Neuroscience, Biomedicine and Movement Sciences; Section of Psychiatry; University of Verona; Verona, Italy (e-mail: [federico.bertolini@univr.it](mailto:federico.bertolini@univr.it))

**Table S1: LAI Discontinuation rates at 12 months after first prescription**

| LAI                | Discontinuers (%) | Received LAI at baseline |
|--------------------|-------------------|--------------------------|
| Paliperidone-LAI   | 38 (33.9)         | 112                      |
| Aripiprazole-LAI   | 35 (35.4)         | 99                       |
| Haloperidol-LAI    | 34 (40.0)         | 85                       |
| Risperidone-LAI    | 19 (51.4)         | 37                       |
| Fluphenazine-LAI   | 11 (40.74)        | 27                       |
| Zuclopenthixol-LAI | 7 (43.75)         | 16                       |
| Olanzapine-LAI     | 10 (62.5)         | 16                       |
| Perphenazine-LAI   | 1 (50.0)          | 2                        |
| All LAIs           | 155 (39.3)        | 394                      |

**Table S2: Adverse events leading to LAI discontinuation**

| Adverse events leading to LAI discontinuation | N  |
|-----------------------------------------------|----|
| Muscle stiffness                              | 10 |
| Tremor                                        | 6  |
| Slowing of movements                          | 5  |
| Akathisia                                     | 5  |
| Sleepiness                                    | 5  |
| General Malaise                               | 3  |
| Erectile Dysfunction                          | 3  |
| Weight Gain                                   | 3  |
| Involuntary Movement                          | 2  |
| Fatigue                                       | 2  |
| Tension                                       | 1  |
| Skin Rash                                     | 1  |
| Hyperprolactinemia.                           | 1  |
| Flattened Affectivity                         | 1  |
| Depression                                    | 1  |
| Missing                                       | 2  |
| Total                                         | 51 |

**Table S3: Reasons for discontinuing each LAI over the 12 months after first prescription**

|                            | Paliperidone-LAI | Aripiprazole-LAI | Haloperidol-LAI | Risperidone-LAI | Fluphenazine-LAI | Zuclopenthixol-LAI | Olanzapine-LAI | Perphenazine-LAI |
|----------------------------|------------------|------------------|-----------------|-----------------|------------------|--------------------|----------------|------------------|
| Adverse events             | 9                | 8                | 9               | 12              | 6                | 3                  | 4              | 0                |
| Participant's refusal      | 10               | 8                | 9               | 1               | 0                | 1                  | 2              | 1                |
| LAI's not required anymore | 10               | 6                | 10              | 2               | 0                | 1                  | 2              | 0                |
| Inefficacy                 | 6                | 10               | 2               | 3               | 4                | 0                  | 2              | 0                |
| Information not available  | 3                | 3                | 4               | 1               | 1                | 2                  | 0              | 0                |
